# Supplementary material for: Community-Based Measures for Mitigating the 2009 H1N1 Pandemic in China
Source: PubMed Central journal article supplement (PMC2887838; doi:10.1371/journal.pone.0010911), 2010-06-18
Supplement: pone.0010911.s006.pdf [file pone.0010911.s006.pdf]

| Parameter  | Definition                                                               | Source               | mean values            |
|------------|--------------------------------------------------------------------------|----------------------|------------------------|
| $\beta$    | baseline transmission rate of infection                                  | calculated           | 4.182                  |
| $q_e$      | quarantine rate during latency infection (days <sup>-1</sup> )           | MCMC                 | 0.125                  |
| $q_p$      | quarantine rate during pre-symptomatic infection(days <sup>-1</sup> )    | MCMC                 | 0.387                  |
| $q_a$      | quarantine rate during asymptomatic infection(days <sup>-1</sup> )       | MCMC                 | 0.498                  |
| $\phi$     | proportion of exposed person who performed effective precaution ([0, 1]) | assumed              | 0.4                    |
| $\epsilon$ | relative infectiousness of the pre-symptomatic class ([0, 1])            | MCMC                 | 0.515                  |
| $\varrho$  | relative infectiousness of the asymptomatic class([0, 1])                | MCMC                 | 0.433                  |
| $\rho$     | proportion of clinical infections ([0, 1])                               | MCMC                 | 0.802                  |
| $\delta_1$ | rate of progression to pre-symptomatic class (days <sup>-1</sup> )       | Tuite et al (2009)   | 1/2.62 (1/3.12-1/2.28) |
| $\delta_2$ | rate of progression to infectious with symptoms (days <sup>-1</sup> )    | Tuite et al (2009)   | 1 (1/1.72-1/0.88)      |
| $\delta_3$ | isolation rate (days <sup>-1</sup> )                                     | MCMC                 | 1.094                  |
| $\gamma_1$ | recovery rate for symptomatic class (days <sup>-1</sup> )                | Tuite et al (2009)   | 1/3.38 (1/4.69-1/2.06) |
| $\gamma_2$ | recovery rate for hospitalized class (days <sup>-1</sup> )               | Tuite et al (2009)   | 1/3.38 (1/4.69-1/2.06) |
| $\gamma_3$ | recovery rate for asymptomatic class (days <sup>-1</sup> )               | Gojovic et al.(2009) | 1/2.5                  |
