# Supplementary material for: Community-Based Measures for Mitigating the 2009 H1N1 Pandemic in China
Source: PubMed Central journal article supplement (PMC2887838; doi:10.1371/journal.pone.0010911), 2010-06-18
Supplement: pone.0010911.s007.pdf [file pone.0010911.s007.pdf]

| from  | to     | mean $R_c$ | 95% CI         |
|-------|--------|------------|----------------|
| Sep.3 | Sep.19 | 1.474      | (1.260, 1.688) |
| Sep.3 | Sep.20 | 1.626      | (1.386, 1.866) |
| Sep.3 | Sep.21 | 1.682      | (1.446, 1.918) |
| Sep.3 | Sep.22 | 1.644      | (1.412, 1.876) |
| Sep.3 | Sep.23 | 1.568      | (1.376, 1.760) |
| Sep.3 | Sep.24 | 1.476      | (1.306, 1.646) |
